# Supplementary material for: Applying next generation sequencing with microdroplet PCR to determine the disease-causing mutations in retinal dystrophies
Source: Springer Nature journal article supplement (doi:10.1186/s12886-017-0549-5), 2017-08-24
Supplement: MOESM1 [file 14239352]

Supplementary Table 1. Summary of genes and their clinical correlation

| Clinical classes of retinal disorders                             | Disease inheritable genes* |                |                 |                |                |                |                |               |                |                |               |               |               |               |               |  |
|-------------------------------------------------------------------|----------------------------|----------------|-----------------|----------------|----------------|----------------|----------------|---------------|----------------|----------------|---------------|---------------|---------------|---------------|---------------|--|
| Bardet-Biedl syndrome, autosomal recessive                        | <i>ARL6</i>                | <i>BBS1</i>    | <i>BBS2</i>     | <i>BBS4</i>    | <i>BBS5</i>    | <i>BBS7</i>    | <i>BBS9</i>    | <i>BBS10</i>  | <i>BBS12</i>   | <i>CEP290</i>  | <i>INPP5E</i> | <i>MKKS</i>   | <i>MKS1</i>   | <i>TRIM32</i> | <i>TTC8</i>   |  |
| Chorioretinal atrophy or degeneration, autosomal dominant         | <i>RGR</i>                 | <i>TEAD1</i>   |                 |                |                |                |                |               |                |                |               |               |               |               |               |  |
| Cone or cone-rod dystrophy, autosomal dominant                    | <i>AIP1L1</i>              | <i>CRX</i>     | <i>GUCY1A1A</i> | <i>GUCY2D</i>  | <i>PITPNM3</i> | <i>PROM1</i>   | <i>PRPH2</i>   | <i>RIMS1</i>  | <i>SEMA4A</i>  | <i>UNC119</i>  |               |               |               |               |               |  |
| Cone or cone-rod dystrophy, autosomal recessive                   | <i>ABCA4</i>               | <i>ADAM9</i>   | <i>CACNA2D4</i> | <i>CDHR1</i>   | <i>CERKL</i>   | <i>CNGB3</i>   | <i>KCNV2</i>   | <i>PDE6C</i>  | <i>RAX2</i>    | <i>RDH5</i>    | <i>RPGRI1</i> |               |               |               |               |  |
| Cone or cone-rod dystrophy, X-linked                              | <i>CACNA1F</i>             | <i>RPGR</i>    |                 |                |                |                |                |               |                |                |               |               |               |               |               |  |
| Congenital stationary night blindness, autosomal dominant         | <i>GNAT1</i>               | <i>PDE6B</i>   | <i>RHO</i>      |                |                |                |                |               |                |                |               |               |               |               |               |  |
| Congenital stationary night blindness, autosomal recessive        | <i>CABP4</i>               | <i>GRK1</i>    | <i>GRM6</i>     | <i>RDH5</i>    | <i>SAG</i>     | <i>SLC24A1</i> | <i>TRPM1</i>   |               |                |                |               |               |               |               |               |  |
| Congenital stationary night blindness, X-linked                   | <i>CACNA1F</i>             | <i>NYX</i>     |                 |                |                |                |                |               |                |                |               |               |               |               |               |  |
| Deafness alone or syndromic, autosomal dominant                   | <i>WFS1</i>                |                |                 |                |                |                |                |               |                |                |               |               |               |               |               |  |
| Deafness alone or syndromic, autosomal recessive                  | <i>CDH23</i>               | <i>DFNB31</i>  | <i>MYO7A</i>    | <i>PCDH15</i>  | <i>PDZD7</i>   | <i>USH1C</i>   |                |               |                |                |               |               |               |               |               |  |
| Leber congenital amaurosis, autosomal dominant                    | <i>CRX</i>                 | <i>IMPDH1</i>  | <i>OTX2</i>     |                |                |                |                |               |                |                |               |               |               |               |               |  |
| Leber congenital amaurosis, autosomal recessive                   | <i>AIP1L1</i>              | <i>CABP4</i>   | <i>CEP290</i>   | <i>CRB1</i>    | <i>CRX</i>     | <i>GUCY2D</i>  | <i>IQCB1</i>   | <i>LCA5</i>   | <i>LRAT</i>    | <i>RD3</i>     | <i>RDH12</i>  | <i>RPE65</i>  | <i>RPGRI1</i> | <i>SPATA7</i> | <i>TULP1</i>  |  |
| Macular degeneration, autosomal dominant                          | <i>BEST1</i>               | <i>C10orf5</i> | <i>EFEMP1</i>   | <i>ELOVL4</i>  | <i>FSCN2</i>   | <i>GUCY1B</i>  | <i>HMCN1</i>   | <i>PROM1</i>  | <i>PRPH2</i>   | <i>RP1L1</i>   | <i>TIMP3</i>  |               |               |               |               |  |
| Macular degeneration, autosomal recessive                         | <i>ABCA4</i>               | <i>CFH</i>     |                 |                |                |                |                |               |                |                |               |               |               |               |               |  |
| Macular degeneration, X-linked                                    | <i>RPGR</i>                |                |                 |                |                |                |                |               |                |                |               |               |               |               |               |  |
| Ocular-retinal developmental disease, autosomal dominant          | <i>VCAN</i>                |                |                 |                |                |                |                |               |                |                |               |               |               |               |               |  |
| Optic atrophy, autosomal dominant                                 | <i>OPA1</i>                |                |                 |                |                |                |                |               |                |                |               |               |               |               |               |  |
| Optic atrophy, autosomal recessive                                | <i>TMEM126A</i>            |                |                 |                |                |                |                |               |                |                |               |               |               |               |               |  |
| Optic atrophy, X-linked                                           | <i>TMEM8A</i>              |                |                 |                |                |                |                |               |                |                |               |               |               |               |               |  |
| Retinitis pigmentosa, autosomal dominant                          | <i>BEST1</i>               | <i>CA4</i>     | <i>CRX</i>      | <i>FSCN2</i>   | <i>GUCY1B</i>  | <i>IMPDH1</i>  | <i>KLHL7</i>   | <i>NR2E3</i>  | <i>NRL</i>     | <i>PRPF3</i>   | <i>PRPF8</i>  | <i>PRPF31</i> | <i>PRPH2</i>  | <i>RDH12</i>  | <i>RHO</i>    |  |
| Retinitis pigmentosa, autosomal recessive                         | <i>ROM1</i>                | <i>RP1</i>     | <i>RP9</i>      | <i>SEMA4A</i>  | <i>SMRN200</i> | <i>TOPOORS</i> |                |               |                |                |               |               |               |               |               |  |
| Retinitis pigmentosa, X-linked                                    | <i>RP2</i>                 |                |                 |                |                |                |                |               |                |                |               |               |               |               |               |  |
| Syndromic/systemic diseases with retinopathy, autosomal dominant  | <i>ABCC6</i>               | <i>ATXN7</i>   | <i>COL11A1</i>  | <i>COL2A1</i>  | <i>JAG1</i>    | <i>KCNJ13</i>  | <i>PAX2</i>    | <i>TREX1</i>  | <i>VCAN</i>    |                |               |               |               |               |               |  |
| Syndromic/systemic diseases with retinopathy, autosomal recessive | <i>ABCC6</i>               | <i>AH1</i>     | <i>ALMS1</i>    | <i>CC2D2A</i>  | <i>CEP290</i>  | <i>CLN3</i>    | <i>COL9A1</i>  | <i>FLVCR1</i> | <i>INPP5E</i>  | <i>INVS</i>    | <i>IQCB1</i>  | <i>LRP5</i>   | <i>MKS1</i>   | <i>MTTP</i>   | <i>NPHP1</i>  |  |
| Syndromic/systemic diseases with retinopathy, X-linked            | <i>NPHP3</i>               | <i>NPHP4</i>   | <i>OPA3</i>     | <i>PANK2</i>   | <i>PEX1</i>    | <i>PEX7</i>    | <i>PHYH</i>    | <i>PXMP3</i>  | <i>RPGRI1L</i> | <i>SDCCAG8</i> | <i>TTPA</i>   | <i>WFS1</i>   |               |               |               |  |
| Usher syndrome, autosomal recessive                               | <i>CDH23</i>               | <i>CLRN1</i>   | <i>DFNB31</i>   | <i>GPR98</i>   | <i>MYO7A</i>   | <i>PCDH15</i>  | <i>USH1C</i>   | <i>USH1G</i>  | <i>USH2A</i>   |                |               |               |               |               |               |  |
| Other retinopathy, autosomal dominant                             | <i>BEST1</i>               | <i>CRB1</i>    | <i>FZD4</i>     | <i>LRP5</i>    | <i>OPN1SW</i>  | <i>RB1</i>     | <i>TSPAN12</i> |               |                |                |               |               |               |               |               |  |
| Other retinopathy, autosomal recessive                            | <i>BEST1</i>               | <i>CDH3</i>    | <i>CNGA3</i>    | <i>CNGB3</i>   | <i>CNNM4</i>   | <i>CYP4V2</i>  | <i>GNAT2</i>   | <i>LRP5</i>   | <i>MFRP</i>    | <i>NR2E3</i>   | <i>OAT</i>    | <i>PROM1</i>  | <i>RPB4</i>   | <i>RG59</i>   | <i>RG59BP</i> |  |
| Other retinopathy, X-linked                                       | <i>CACNA1F</i>             | <i>CHM</i>     | <i>DMD</i>      | <i>NDP</i>     | <i>OPN1LW</i>  | <i>OPN1MW</i>  | <i>PGK1</i>    | <i>RS1</i>    |                |                |               |               |               |               |               |  |
| Eye development related genes                                     | <i>PAX6</i>                | <i>CHD7</i>    | <i>TMEM67</i>   | <i>MKS1</i>    | <i>HMX1</i>    | <i>GDPS</i>    | <i>GDF3</i>    | <i>BMP4</i>   | <i>BMP7</i>    | <i>VSX2</i>    | <i>MITF</i>   | <i>NLZ1</i>   | <i>NLZ2</i>   |               |               |  |
| Pigmentation genes                                                | <i>TYR</i>                 | <i>OCA2</i>    | <i>TYRP1</i>    | <i>SLC45A2</i> | <i>SLC24A4</i> | <i>ASIP</i>    | <i>MC1R</i>    |               |                |                |               |               |               |               |               |  |

Note: \*Some of the genes appeared in two or more classes of disorders.
