# Supplementary material for: Applying next generation sequencing with microdroplet PCR to determine the disease-causing mutations in retinal dystrophies
Source: Springer Nature journal article supplement (doi:10.1186/s12886-017-0549-5), 2017-08-24
Supplement: MOESM2 [file 14239352]

**Supplementary Table 2. Summary of Retinal Dystrophy primer library design**

|                                                      |         |
|------------------------------------------------------|---------|
| Candidate genes for targeted sequencing              | 184     |
| Number of submitted targets                          | 2,827   |
| Number of exons in complete design                   | 2,078   |
| Number of amplicons in complete design               | 3071    |
| Total number of amplicon bases in complete design    | 921,989 |
| Total number of unique loci bases in complete design | 560,253 |
| Percent of unique loci bases covered                 | 99.89%  |
| Number of MP* amplicons in complete design           | 35      |

Note: \*Primers can be mapped to multiple locations in the genome due to sequence similarity. Primers of genes which can be mapped to multiple locations are as follows: OPN1LW, OPN1MW.
