# Supplementary material for: Applying next generation sequencing with microdroplet PCR to determine the disease-causing mutations in retinal dystrophies
Source: Springer Nature journal article supplement (doi:10.1186/s12886-017-0549-5), 2017-08-24
Supplement: MOESM3 [file 14239352]

Supplementary Table 3. Summary of candidate variants in this cohort

| Sample ID | Candidate Gene(s) | Transcript     | Nucleotide Change       | Amino Acid Change     | Genotypes (Sanger confirmed) | HGMD or dbSNP IDs    | References                       |
|-----------|-------------------|----------------|-------------------------|-----------------------|------------------------------|----------------------|----------------------------------|
| RD13-01   | <i>GUCY1A1</i>    | NM_000409.3    | c.296A>G                | p.Y99C                | Heterozygous                 | CM980960             | Payne et al. [1998]              |
| RD1-07    | <i>PRPF31</i>     | NM_015629.3    | c.220C>T                | p.Q74*                | Heterozygous                 | CM063073             | Sullivan et al. [2006]           |
| RD20-06   | <i>PRPH2</i>      | NM_000322.4    | c.514C>T                | p.R172W               | Heterozygous                 | CM930639             | Poloschek et al. [2010]          |
| RD20-07   | <i>PRPH2</i>      | NM_000322.4    | c.514C>T                | p.R172W               | Heterozygous                 | CM930639             | Poloschek et al. [2010]          |
| RD2-01    | <i>RGR</i>        | NM_001012720.1 | c.824dupG               | p.L276N*77            | Heterozygous                 | C1993291             | Morimura et al. 1999             |
| RD11-03   | <i>RHO</i>        | NM_000539.3    | c.574dup                | p.Y192Lfs*139         | Heterozygous                 | Novel                |                                  |
| RD14-07   | <i>TOPORS</i>     | NM_005802.4    | c.2474dupA              | p.Y825*               | Heterozygous                 | CSI075704            | Chakarova et al [2007]           |
| RD10-02   | <i>RPIL1</i>      | NM_178857.5    | c.133C>T                | p.R45W                | Heterozygous                 | CM105618             | Akahori et al [2010]             |
| RD5-08    | <i>CERKL</i>      | NM_001030311.2 | c.1045_1046del          | p.M349Vfs*20          | Heterozygous                 | Novel                |                                  |
|           |                   |                | c.316C>T                | p.R106C               | Heterozygous                 | Novel                |                                  |
| RD14-08   | <i>USH2A</i>      | NM_206933.2    | c.2276G>T               | p.C759F               | Heterozygous                 | CM001372             | Garcia-Garcia et al. [2011]      |
|           |                   |                | c.4108G>C               | p.Va370L              | Heterozygous                 | Novel                |                                  |
| RD20-08   | <i>USH2A</i>      | NM_206933.2    | c.2299delG              | p.E766Sfs*21          | Heterozygous                 | CD982997             | O'Sullivan et al. [2012]         |
|           |                   |                | c.2276G>T               | p.C759F               | Heterozygous                 | CM001372             | Garcia-Garcia et al. [2011]      |
| RD20-05   | <i>CACNA1F</i>    | NM_005183.3    | c.2576+1G>A             | IVS20+1G>A            | Hemizygous                   | Novel                |                                  |
| RD6-08    | <i>CHM</i>        | NM_000390.2    | c.49+2dupT              | IVS1+2dupT            | Hemizygous                   | CI137323             | Ramsden et al. [2013]            |
| RD12-02   | <i>RPGR</i>       | NM_000328.2    | c.1088_1089delinsA      | p.V363Dfs*18          | Hemizygous                   | Novel                |                                  |
| RD4-04    | <i>ABCA4</i>      | NM_000350.2    | c.1804C>T               | p.R602W               | Homozygous                   | CM990025             | Ribeiro-Alvarez et al. [2013]    |
| RD6-01    | <i>BBS1</i>       | NM_024649.4    | c.1169T>G               | p.M390R               | Homozygous                   | CM021489             | Baveillette et al. [2003]        |
| RD12-06   | <i>CERKL</i>      | NM_001030311.2 | c.481+2T>G              | IVS2+2T>G             | Homozygous                   | CS140556             | Glockle et al. [2013]            |
| RD4-06    | <i>EYS</i>        | NM_001142800.1 | c.2259+1G>A             | IVS14+1G>A            | Heterozygous                 | CS150721             | Bonilha et al. [2014]            |
|           |                   |                | c.6137G>A               | p.W2046*              | Heterozygous                 | Novel                |                                  |
| RD6-07    | <i>EYS</i>        | NM_001142800.1 | c.8473_8474insT         | p.V2804fs             | Heterozygous                 | Novel                |                                  |
|           |                   |                | c.1153T>G               | p.C385G               | Heterozygous                 | Novel                |                                  |
| RD12-05   | <i>EYS</i>        | NM_001142800.1 | c.6416G>A               | p.C2139Y              | Heterozygous                 | CM102730             | Audo et al. [2010]               |
|           |                   |                | c.7868G>A               | p.G2623E              | Heterozygous                 | Novel                |                                  |
| RD13-05   | <i>GUCY2D</i>     | NM_000180.3    | c.2375C>T               | p.P792L               | Heterozygous                 | rs763774686          |                                  |
| RD11-08   | <i>IMPDH1</i>     | NM_000883.3    | c.931G>A                | p.D311N               | Heterozygous                 | CM020283             | Bowne et al. [2002]              |
| RD15-03   | <i>IMPDH1</i>     | NM_000883.3    | c.931G>A                | p.D311N               | Heterozygous                 | CM020283             | Bowne et al. [2002]              |
| RD5-04    | <i>RHO</i>        | NM_000539.3    | c.68C>A                 | p.P23H                | Heterozygous                 | CM900197             | Dryja et al [1990]               |
| RD13-02   | <i>RHO</i>        | NM_000539.3    | c.68C>A                 | p.P23H                | Heterozygous                 | CM900197             | Dryja et al [1990]               |
| RD12-08   | <i>RHO</i>        | NM_000539.3    | c.561T>G                | p.C187W               | Heterozygous                 | Novel                |                                  |
| RD12-07   | <i>RHO</i>        | NM_000539.3    | c.936+1G>T              | IVS4+1G>T             | Heterozygous                 | CS920776             | Hernan et al. [2011]             |
| RD14-06   | <i>PRPH2</i>      | NM_000322.4    | c.514C>T                | p.R172W               | Heterozygous                 | CM930639             | Poloschek et al. [2010]          |
| RD12-03   | <i>RPE65</i>      | NM_000329.2    | c.886dup                | p.R296Kfs*7           | Homozygous                   | CI107001             | Coppieters et al. [2010]         |
| RD12-01   | <i>RPGR</i>       | NM_000328.2    | c.197A>G                | p.Q66R                | Hemizygous                   | Novel                |                                  |
| RD6-05    | <i>TIMP3</i>      | NM_000362.4    | c.29T>A                 | p.L10H                | Heterozygous                 | Novel                |                                  |
| RD20-03   | <i>TRPM1</i>      | NM_002420.5    | c.1197G>A               | p.P421=               | Heterozygous                 | CS097758             | Audo et al. [2009]               |
|           |                   |                | c.215A>G                | p.Y72C                | Heterozygous                 | CM097760             | Audo et al. [2009]               |
| RD6-04    | <i>TRPM1</i>      | NM_002420.5    | c.2947_2948delGCinsAT   | p.A983I               | Heterozygous                 | Novel                |                                  |
|           |                   |                | c.3125T>G               | p.L1042R              | Heterozygous                 | Novel                |                                  |
| RD14-02   | <i>USH2A</i>      | NM_206933.2    | c.11411del              | p.P3804Lfs*13         | Heterozygous                 | CD149996             | Baux et al. [2014]               |
|           |                   |                | c.8431C>A               | p.P2811T              | Heterozygous                 | rs11033529           |                                  |
| RD11-04   | <i>USH2A</i>      | NM_206933.2    | c.13335_13347delinsCTTG | p.E4445_54449delinsDL | Heterozygous                 | CX104126             | McGee et al. [2010]              |
|           |                   |                | c.14402_14403del        | p.Y4801Ffs*20         | Heterozygous                 | Novel                |                                  |
| RD14-04   | <i>GUCY1A1</i>    | NM_000409.3    | c.296A>G                | p.Y99C                | Heterozygous                 | CM980960             | Payne et al. [1998]              |
| RD2-02    | <i>RGR</i>        | NM_001012720.1 | c.824dupG               | p.L276N*77            | Heterozygous                 | C1993291             | Morimura et al. [2000]           |
| RD10-02   | <i>RPIL1</i>      | NM_178857.5    | c.133C>T                | p.R45W                | Heterozygous                 | CM105618             | Akahori et al [2010]             |
| RD10-02   | <i>RPIL1</i>      | NM_178857.5    | c.133C>T                | p.R45W                | Heterozygous                 | CM105618             | Akahori et al [2010]             |
| RD18-02   | <i>CERKL</i>      | NM_001030311.2 | c.1045_1046del          | p.M349Vfs*20          | Heterozygous                 | Novel                |                                  |
|           |                   |                | c.316C>T                | p.R106C               | Heterozygous                 | Novel                |                                  |
| RD20-02   | <i>USH2A</i>      | NM_206933.2    | c.2299delG              | p.E766Sfs*21          | Heterozygous                 | CD982997             | O'Sullivan et al. [2012]         |
|           |                   |                | c.2276G>T               | p.C759F               | Heterozygous                 | CM001372             | Garcia-Garcia et al. [2011]      |
| RD1-12    | <i>C2orf71</i>    | NM_001029883.2 | c.1514G>A               | p.W505*               | Heterozygous                 | CM1511740            | Yang et al [2015]                |
|           |                   |                | c.3266dup               | p.S1090Ifs*17         | Heterozygous                 | Novel                |                                  |
|           |                   |                | c.1375C>T               | p.Q459*               | Heterozygous                 | Novel                |                                  |
|           |                   |                | c.1557T>G               | p.Y519*               | Heterozygous                 | CM135790             | Simeonov et al. [2013]           |
|           |                   |                | c.834C>G                | p.Y278*               | Heterozygous                 | CM083852             | Hutton et al. [2008]             |
| RD11-05   | <i>GUCY1A1</i>    | NM_000409.3    | c.149C>T                | p.P50L                | Heterozygous                 | CM012969             | Downes et al. [2001]             |
| RD11-06   | <i>GUCY2D</i>     | NM_000180.3    | c.1724C>T               | p.P575L               | Heterozygous                 | CM023932/rs28743021  | Small et al. [2008]              |
|           |                   |                | c.1217C>T               | p.P406L               | Heterozygous                 | CM910385/rs104894313 | Giebel et al. [1991]             |
|           |                   |                | c.1261+1G>A             | IVS9+1G>A             | Heterozygous                 | rs140365820          |                                  |
| RD14-05   | <i>TRPM1</i>      | NM_002420.5    | c.1192T>C               | p.W398R               | Heterozygous                 | Novel                |                                  |
|           |                   |                | c.3914G>A               | p.R1305H              | Heterozygous                 | Novel                |                                  |
| RD14-03   | <i>ABCA4</i>      | NM_000350.2    | c.5714+5G>A             | IVS40+5G>A            | Heterozygous                 | CS982057             | Creemers et al. [1998]           |
|           |                   |                | c.8600C>T               | p.S2867L              | Heterozygous                 | rs145468090          |                                  |
|           |                   |                | c.10552G>A              | p.V3518I              | Heterozygous                 | rs75397806           |                                  |
| RD4-05    | <i>EYS</i>        | NM_001142800.1 | c.6138G>A               | p.W2046*              | Heterozygous                 | Novel                |                                  |
| RD11-02   | <i>EYS</i>        | NM_001142800.1 | c.5677_5681del          | p.Y1893Rfs*12         | Heterozygous                 | Novel                |                                  |
| RD15-01   | <i>ABCA4</i>      | NM_000350.2    | c.4685T>C               | p.I1562T              | Heterozygous                 | CM970013             | Allikmets et al. [1997]          |
|           |                   |                | c.1753C>T               | p.P585S               | Heterozygous                 | CM111852             | Fernandez-Martinez et al. [2011] |
|           |                   |                | c.4574C>T               | p.A1525V              | Heterozygous                 | CM078457             | Guo & Cooper [2007]              |
| RD14-01   | <i>BBS9</i>       | NM_198428.2    | c.1280C>T               | p.A427V               | Heterozygous                 | rs138072724          |                                  |
|           |                   |                | c.1120T>C               | p.W374R               | Heterozygous                 | Novel                |                                  |
|           |                   |                | c.5295C>G               | p.F1765L              | Heterozygous                 | rs201388114          |                                  |
| RD1-07    | <i>ABCA4</i>      | NM_000350.2    | c.635G>A                | p.R212H               | Heterozygous                 | CM020912             | Pang et al. [2002]               |
|           |                   |                | c.6529G>A               | p.D2177N              | Heterozygous                 | CM970023             | Wisniewski et al. [2005]         |
|           |                   |                | c.1552G>A               | p.E518K               | Heterozygous                 | CM1410571(DM?)/rs369 | Liesz et al. [2015]              |
| RD11-03   | <i>CNGA3</i>      | NM_001298.2    | c.1810C>T               | p.Q604*               | Heterozygous                 | Novel                |                                  |
|           |                   |                | c.963T>G                | p.N321K               | Heterozygous                 | CM003833/rs149916178 | Philp et al. [2009]              |
| RD20-07   | <i>CERKL</i>      | NM_001030311.2 | c.769C>T                | p.R257*               | Heterozygous                 | CM040509             | Bornancin et al. [2005]          |
| RD14-08   | <i>GUCY2D</i>     | NM_000180.3    | c.2950T>C               | p.C984R               | Heterozygous                 | Novel                |                                  |
| RD20-02   | <i>CLRN1</i>      | NM_174878.2    | c.218A>G                | p.Q73R                | Heterozygous                 | CM127999             | Licastro et al. [2012]           |
| RD12-02   | <i>CACNA1F</i>    | NM_005183.3    | c.1619T>C               | p.F540S               | Hemizygous                   | Novel                |                                  |
|           |                   |                | c.1387C>T               | p.R463*               | Heterozygous                 | CM110634             | Chaki et al. [2011]              |
| RD12-01   | <i>RPIL1</i>      | NM_178857.5    | c.416dup                | p.G140Rfs*10          | Heterozygous                 | rs201192645          |                                  |
|           |                   |                | c.721G>A                | p.A241T               | Heterozygous                 | CM145799 (DM?)       | Fossbakk et al. [2014]           |
| RD13-02   | <i>ABCA4</i>      | NM_000350.2    | c.1610G>A               | p.R537H               | Heterozygous                 | CM032805             | Jaakson et al [2003]             |

|         |                |             |           |          |              |                     |                                  |
|---------|----------------|-------------|-----------|----------|--------------|---------------------|----------------------------------|
| RD12-07 | <i>TYRP1</i>   | NM_000550.2 | c.1354A>G | p.M452V  | Heterozygous | CM081465            | Hutton et al. [2008]             |
| RD13-08 | <i>ABCA4</i>   | NM_000350.2 | c.6089G>A | p.R2030Q | Heterozygous | CM990070            | Lewis et al. [1999]              |
|         | <i>RPGRIPI</i> | NM_020366.3 | c.1767G>T | p.Q589H  | Heterozygous | CM057749            | Fernández-Martínez et al. [2011] |
| RD15-03 | <i>OCA2</i>    | NM_000275.2 | c.1004C>T | p.T335M  | Heterozygous | rs533988694         |                                  |
| RD20-03 | <i>OCA2</i>    | NM_000275.2 | c.1513A>C | p.F505V  | Heterozygous | None                | UCSC:15-28211959-A-C             |
| RD6-05  | <i>TYR_1</i>   | NM_000372.4 | c.740G>T  | p.C247F  | Heterozygous | Novel               |                                  |
| RD11-07 | <i>OCA2</i>    | NM_000275.2 | c.1574C>T | p.P525L  | Heterozygous | None                | UCSC:15-2821898-G-A              |
| RD11-08 | <i>TYRP1</i>   | NM_000550.2 | c.977G>A  | p.R326H  | Heterozygous | CM135784/rs16929374 |                                  |
| RD13-01 | <i>OCA2</i>    | NM_000275.2 | c.40G>A   | p.A14T   | Heterozygous | rs368928996         |                                  |
