# Supplementary material for: Applying next generation sequencing with microdroplet PCR to determine the disease-causing mutations in retinal dystrophies
Source: Springer Nature journal article supplement (doi:10.1186/s12886-017-0549-5), 2017-08-24
Supplement: MOESM4 [file 14239352]

Supplementary Table 4. Pathogenic variants in OCA related genes

| Sample ID | Family Inheritance | Clinical Diagnosis | Candidate Gene(s) | Transcript   | Nucleotide Change     | Amino Acid Change | Genotypes (Sanger confirmed) | HGMD or dbSNP IDs    | References                               |
|-----------|--------------------|--------------------|-------------------|--------------|-----------------------|-------------------|------------------------------|----------------------|------------------------------------------|
| RD1-12    | Sporadic           | CRD                | <i>C2orf71</i>    | NM_001029883 | c.1514G>A             | p.W505*           | Heterozygous                 | CM1511740            | Yang et al. [2015]                       |
|           |                    |                    | <i>C2orf71</i>    |              | c.3266dup             | p.S1090Ifs*17     | Heterozygous                 | Novel                |                                          |
|           |                    |                    | <i>BBS4</i>       | NM_033028.4  | c.1375C>T             | p.Q459*           | Heterozygous                 | Novel                |                                          |
|           |                    |                    | <i>TYRP1</i>      | NM_000550.2  | c.1557T>G             | p.Y519*           | Heterozygous                 | CM135790             | Simeonov et al. [2013]                   |
|           |                    |                    | <i>SLC45A2</i>    | NM_016180    | c.834C>G              | p.Y278*           | Heterozygous                 | CM083852             | Hutton et al. [2008]                     |
| RD11-06   | Sporadic           | RP                 | <i>GUCY2D</i>     | NM_000180.3  | c.1724C>T             | p.P575L           | Heterozygous                 | CM023932/rs28743021  | Small et al. [2008]                      |
|           |                    |                    | <i>TYR</i>        | NM_000372.4  | c.1217C>T             | p.P406L           | Heterozygous                 | CM910385/rs104894313 | Giebel et al. [1991]                     |
|           |                    |                    | <i>TYRP1</i>      | NM_000550.2  | c.1261+1G>A           | IVS9+1G>A         | Heterozygous                 | rs140365820          |                                          |
| RD12-01   | Sporadic           | RP                 | <i>RP1L1</i>      | NM_178857.5  | c.416dup              | p.G140Rfs*10      | Heterozygous                 | rs201192645          |                                          |
|           |                    |                    | <i>TYR</i>        | NM_000372.4  | c.721G>A              | p.A241T           | Heterozygous                 | CM145799 (DM?)       | Fossbakk et al. [2014]                   |
| RD12-07   | RP                 | Sporadic           | <i>RHO</i>        | NM_000539.3  | c.936+1G>T            | IVS4+1G>T         | Heterozygous                 | CS920776             | Hernan et al. [2011]                     |
|           |                    |                    | <i>TYRP1</i>      | NM_000550.2  | c.1354A>G             | p.M452V           | Heterozygous                 | CM081465             | Hutton et al. [2008]                     |
| RD15-03   | Sporadic           | RP                 | <i>IMPDH1</i>     | NM_000883.3  | c.931G>A              | p.D311N           | Heterozygous                 | CM020283             | Bowne et al. [2002]                      |
|           |                    |                    | <i>OCA2</i>       | NM_000275.2  | c.1004C>T             | p.T335M           | Heterozygous                 | rs533988694          |                                          |
|           |                    |                    | <i>TRPM1</i>      | NM_002420.5  | c.1197G>A<br>c.215A>G | p.P421=<br>p.Y72C | Heterozygous<br>Heterozygous | CS097758<br>CM097760 | Audo et al. [2009]<br>Audo et al. [2009] |
| RD20-03   | Sporadic           | CSNB               | <i>OCA2</i>       | NM_000275.2  | c.1513A>C             | p.F505V           | Heterozygous                 | None                 |                                          |
| RD6-05    | Sporadic           | MD                 | <i>TIMP3</i>      | NM_000362.4  | c.29T>A               | p.L10H            | Heterozygous                 | Novel                | predicted as pathogenic                  |
|           |                    |                    | <i>TYR 1</i>      | NM_000372.4  | c.740G>T              | p.C247F           | Heterozygous                 | Novel                |                                          |
| RD11-07   | Sporadic           | RP                 | <i>OCA2</i>       | NM_000275.2  | c.1574C>T             | p.P525L           | Heterozygous                 | Novel                |                                          |
| RD11-08   | Sporadic           | RP                 | <i>IMPDH1</i>     | NM_000883.3  | c.931G>A              | p.D311N           | Heterozygous                 | CM020283             | Bowne et al. [2002]                      |
| RD11-08   |                    |                    | <i>TYRP1</i>      | NM_000550.2  | c.977G>A              | p.R326H           | Heterozygous                 | CM135784/rs16929374  |                                          |
| RD13-01   | Autosomal dominant | CRD                | <i>GUCAL1A</i>    | NM_000409.3  | c.296A>G              | p.Y99C            | Heterozygous                 | CM980960             | Payne et al. [1998]                      |
|           |                    |                    | <i>OCA2</i>       | NM_000275.2  | c.40G>A               | p.A14T            | Heterozygous                 | rs368928996          |                                          |
